# Supplementary material for: Climate-dependent propagation of precipitation uncertainty into the water cycle
Source: Copernicus journal article supplement (doi:10.5194/hess-2019-660), 2020-01-06
Supplement: Supplementary file 1 [file hess-2019-660-supplement.pdf]

Supplementary Material:

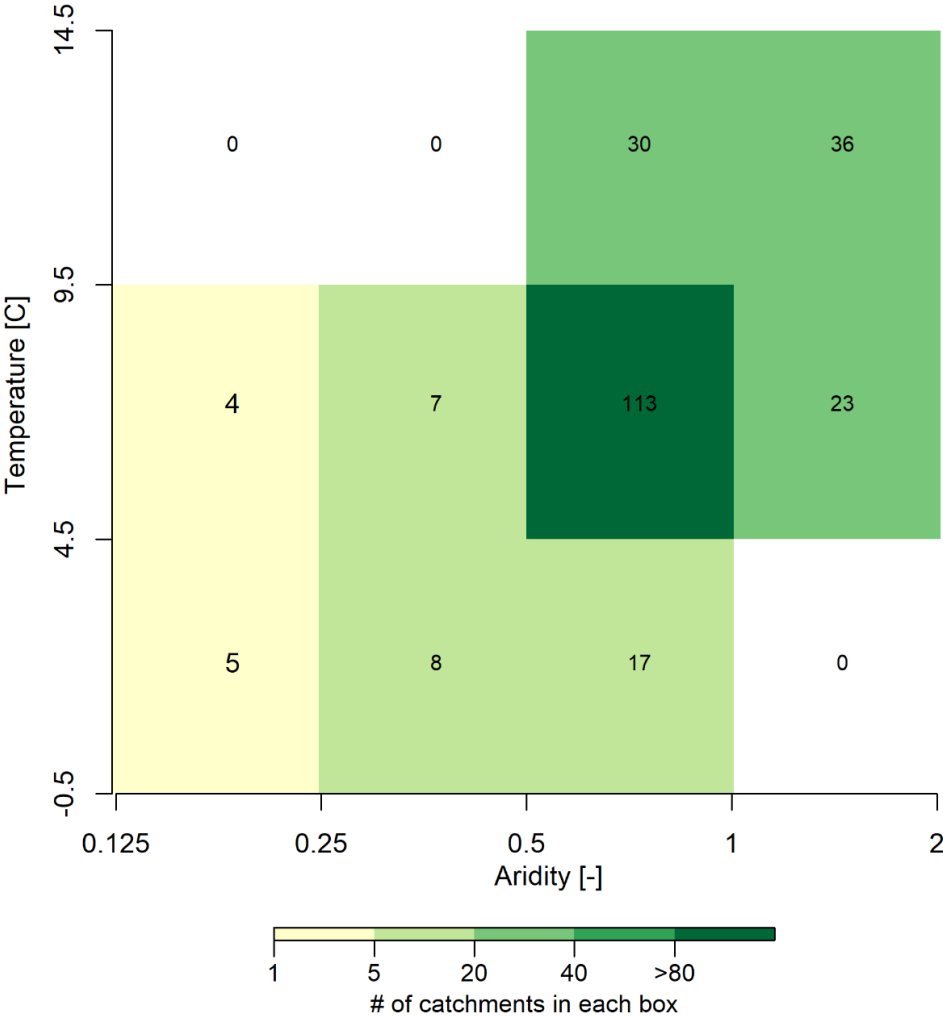

Figure S1: Number of considered catchments in each climatic box. Overall, 243 catchments across Europe are evaluated in this study.

5

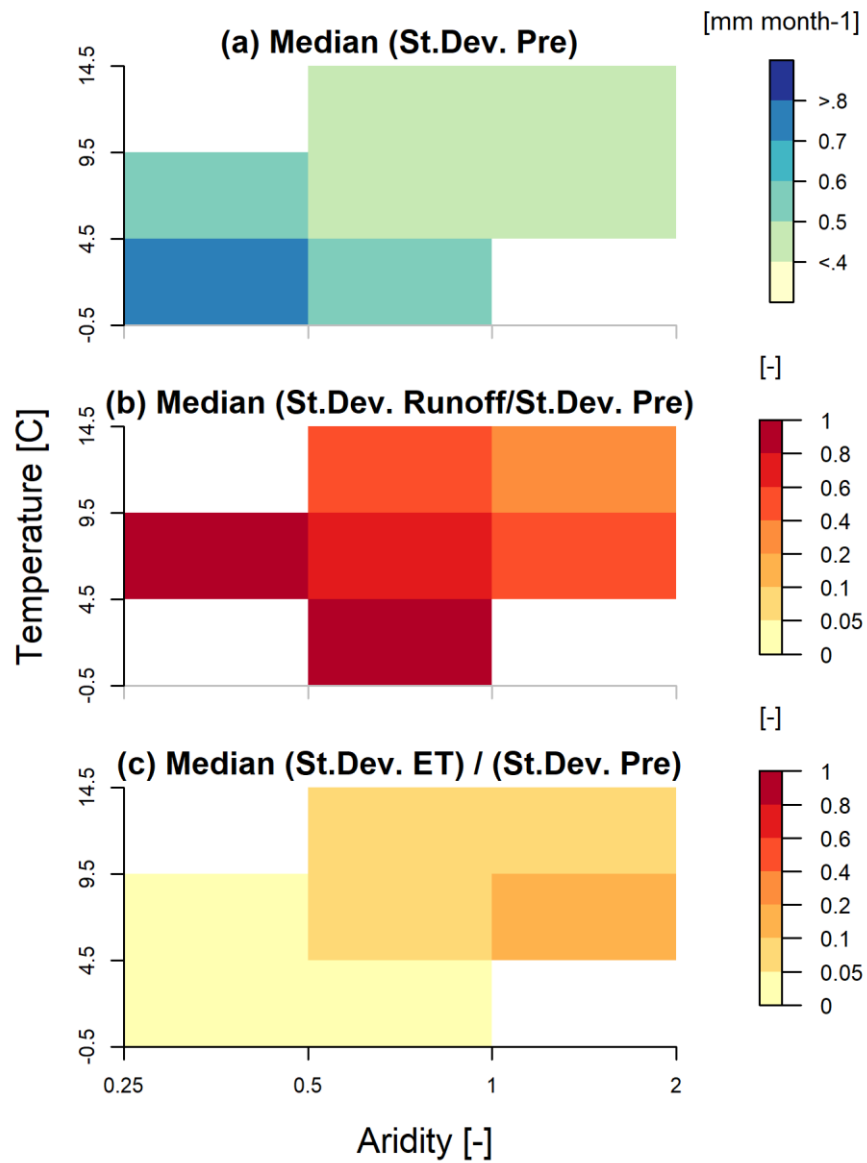

Figure S2: Same as figure 4 in the main text, but with results obtained from the model calibrated using GPCC precipitation data.

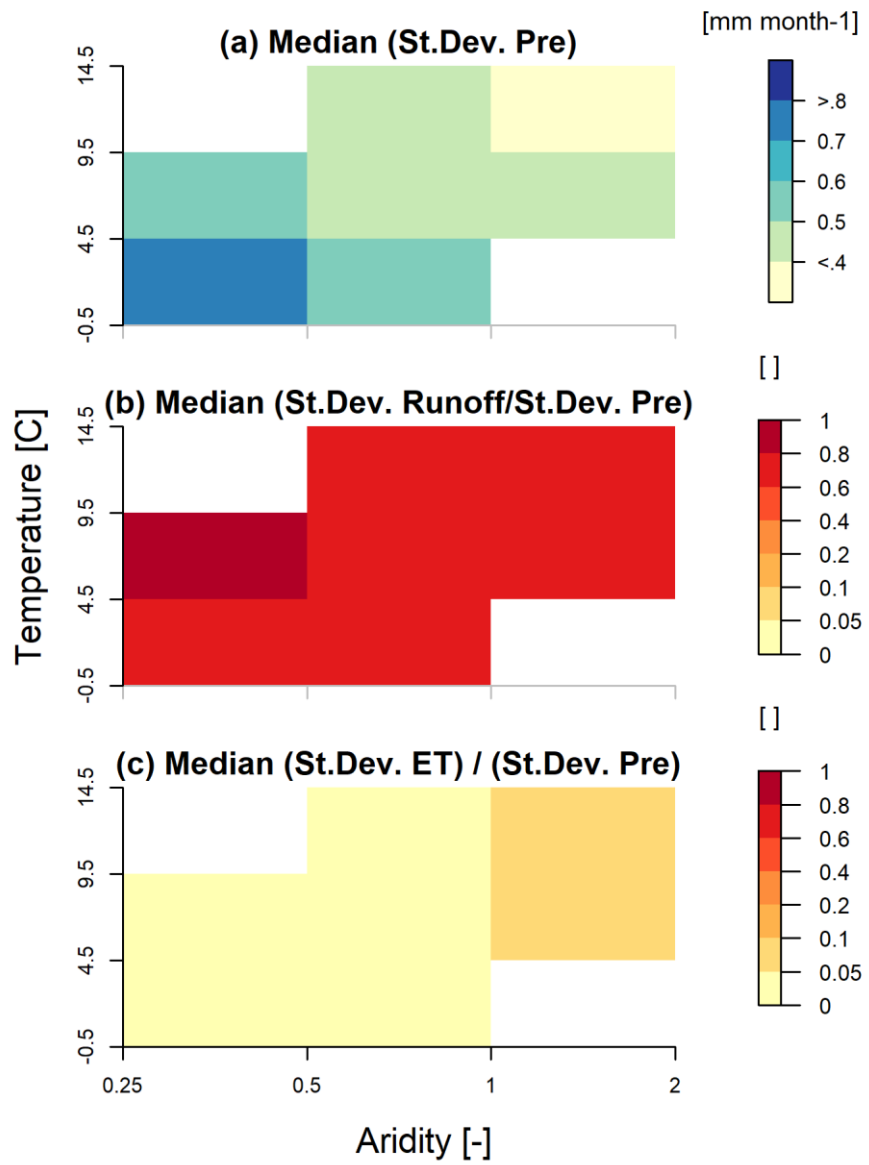

10 **Figure S3:** Same as figure 4 in the main text, but with results computed for whole year.

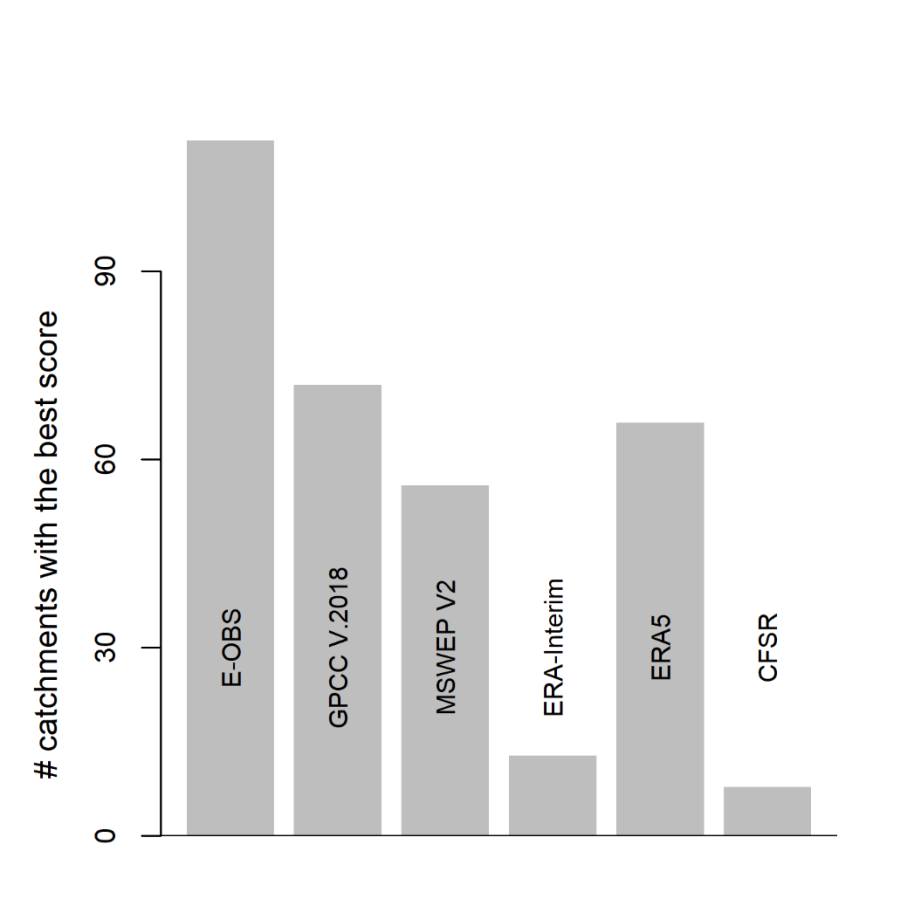

Figure S4: Same as figure 5 in the main text, but with results computed for whole year.

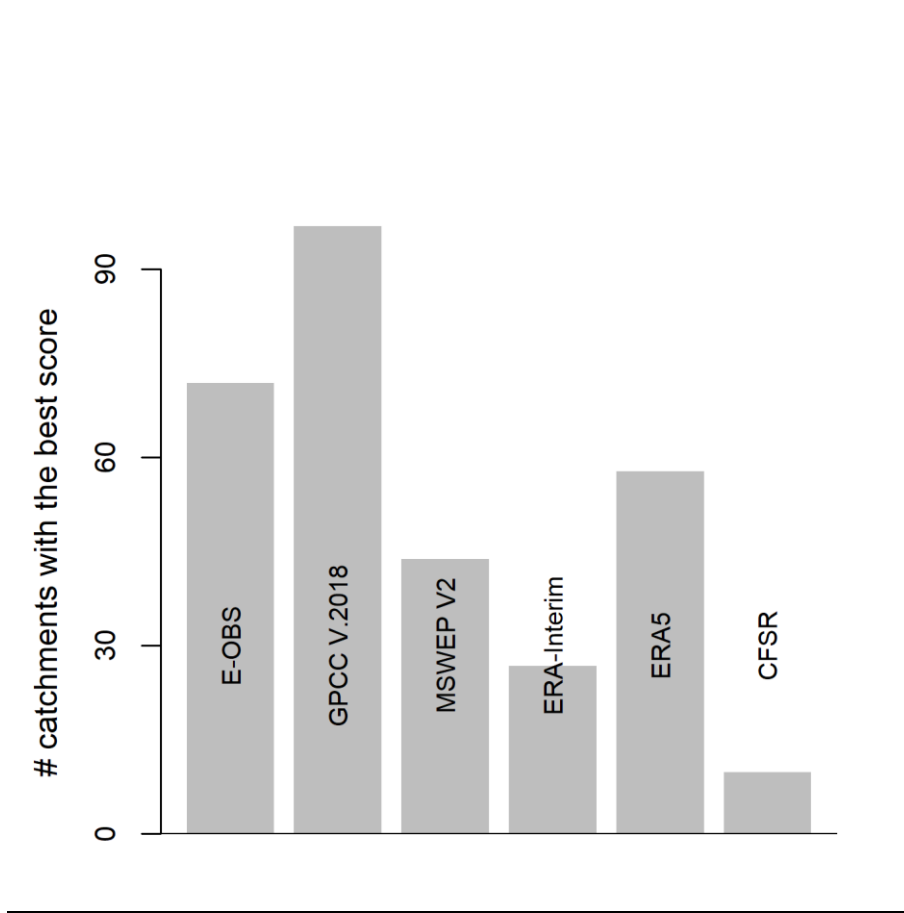

Figure S5: Same as figure 5 in the main text, but with results obtained from the model calibrated using GPCC precipitation data.

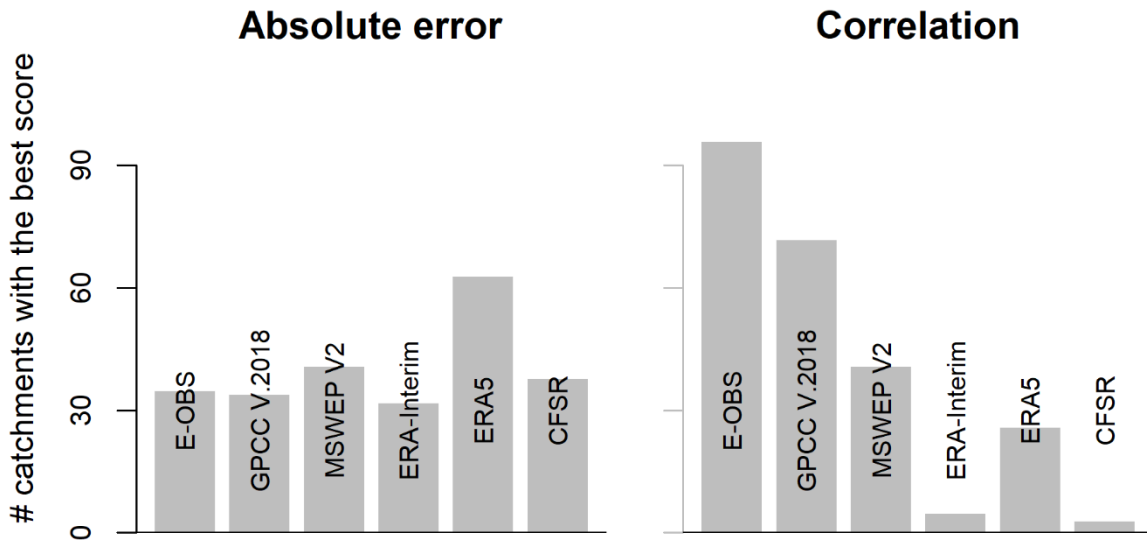

Figure S6: Same as figure 5 in the main text, but with results obtained from absolute error and correlation separately (whole year).
